# Supplementary material for: Maggot Extract Inhibits Cell Migration and Tumor Growth by Targeting HSP90AB1 in Ovarian Cancer
Source: MDPI journal article supplement (doi:10.3390/jcm11216271), 2022-10-25
Supplement: s1 [file s1]

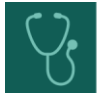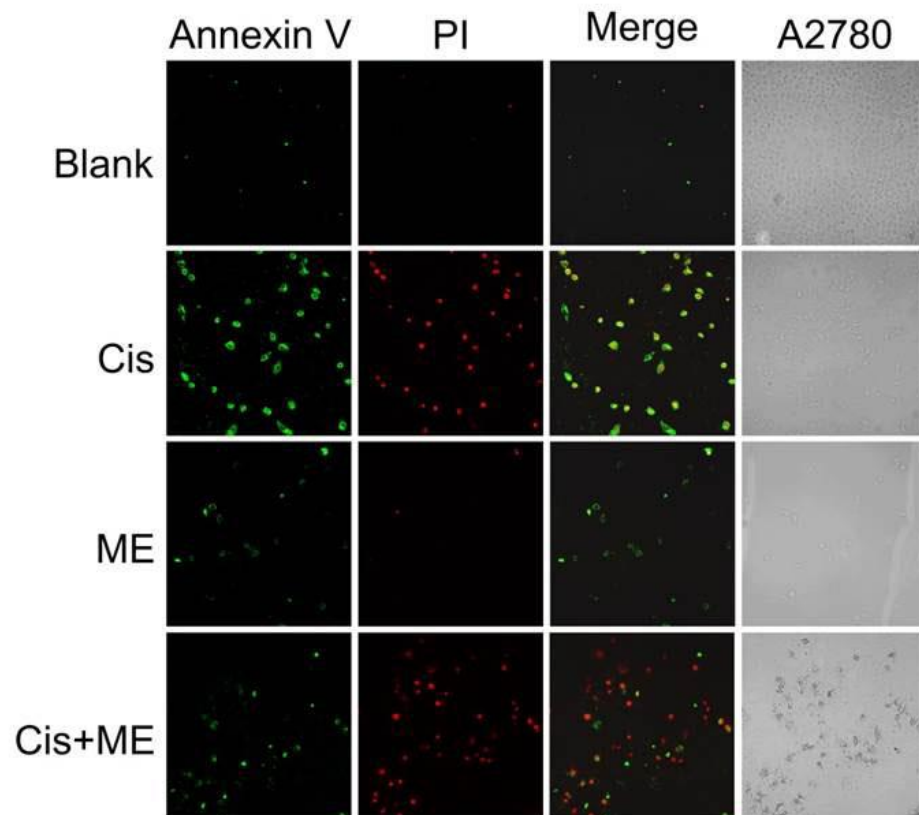

**Figure S1.** ME combined with cisplatin treatments promote apoptosis in A2780 cells. A2780 were treated with 3.2  $\mu\text{g/ml}$  cisplatin and 6 mg/ml MEs for 48 h. A2780 cells were incubated with Annexin V-FITC and PI. The cells were imaged for late apoptosis detection using a FV3000 Olympus microscope.
